# Supplementary material for: Heart rate variability biofeedback for critical illness polyneuropathy: a randomized sham‐controlled study
Source: PubMed Central journal article supplement (PMC11554868; doi:10.1111/ene.16512), 2024-10-18
Supplement: ENE-31-e16512-s002.pdf [file ENE-31-e16512-s002.pdf]

**Supplementary Table S3** Skin blood flow response after sympathetic stimulation

|                         | <b>Baseline</b>     | <b>Post-intervention</b> | <b>Follow-up</b>    |
|-------------------------|---------------------|--------------------------|---------------------|
| <i>HRV biofeedback</i>  |                     |                          |                     |
| <b>VCR</b>              | 53.86 [40.12,67.86] | 56.41 [33.28,66.79]      | 53.75 [38.19,65.83] |
| <i>Sham biofeedback</i> |                     |                          |                     |
| <b>VCR</b>              | 57.38 [40.92,67.94] | 57.53 [36.94,68.42]      | 62.49 [42.85,69.21] |

**Legend to Supplementary Table S3**

All values in median [interquartile range]. Interaction effects between group and time points of measurement were not significant ( $p > 0.05$ ) for VCR. Abbreviations: VCR, vasoconstrictory response
