# Supplementary material for: Heart rate variability biofeedback for critical illness polyneuropathy: a randomized sham‐controlled study
Source: PubMed Central journal article supplement (PMC11554868; doi:10.1111/ene.16512), 2024-10-18
Supplement: ENE-31-e16512-s003.pdf [file ENE-31-e16512-s003.pdf]

## Supplementary Table S4 Sudomotor sympathetic skin response

|                         | Baseline         | Post-intervention | Follow-up        |
|-------------------------|------------------|-------------------|------------------|
| <i>HRV biofeedback</i>  |                  |                   |                  |
| <b>SSR</b>              | 1.69 [0.48,3.61] | 1.15 [0.37,3.09]  | 1.18 [0.32,4.65] |
| <i>Sham biofeedback</i> |                  |                   |                  |
| <b>SSR</b>              | 0.56 [0.07,2.33] | 0.64 [0.06,5.41]  | 0.27 [0.13,0.70] |

### Legend to Supplementary Table S4

All values in median [interquartile range]. Interaction effects between group and time points of measurement were not significant ( $p>0.05$ ) for SSR. Abbreviations: SSR, sympathetic skin response
