# Supplementary material for: Heart rate variability biofeedback for critical illness polyneuropathy: a randomized sham‐controlled study
Source: PubMed Central journal article supplement (PMC11554868; doi:10.1111/ene.16512), 2024-10-18
Supplement: ENE-31-e16512-s004.pdf [file ENE-31-e16512-s004.pdf]

## Supplementary Information S1 Nerve conduction studies and muscle strength at admission

### Nerve conduction studies

#### Study Patient 1

|                            | Motor                      |       |                                       |       |                                       |       | Sensory                             |       |                                         |       |
|----------------------------|----------------------------|-------|---------------------------------------|-------|---------------------------------------|-------|-------------------------------------|-------|-----------------------------------------|-------|
|                            | Distal motor latency (m/s) |       | Compound muscle action potential (mV) |       | Motor nerve conduction velocity (m/s) |       | Sensory nerve action potential (µV) |       | Sensory nerve conduction velocity (m/s) |       |
|                            | ULV                        | Value | LLV                                   | Value | LLV                                   | Value | LLV                                 | Value | LLV                                     | Value |
| <b>N. ulnaris (right)</b>  | 3.5                        | 2.5   | 8.0                                   | 10.6  | 50 – 55                               | 47.4  | 15.0                                | 20.6  | 50.0                                    | 47.4  |
| <b>N. tibialis (right)</b> | 6.0                        | 2.9   | 8.0                                   | 2.7   | 40.0                                  | 32.7  | -                                   | -     | -                                       | -     |
| <b>N. tibialis (left)</b>  | 6.0                        | 3.8   | 8.0                                   | 1.6   | 40.0                                  | 35.5  | -                                   | -     | -                                       | -     |
| <b>N. peroneus (right)</b> | No potential detectable    |       |                                       |       |                                       |       |                                     |       |                                         |       |
| <b>N. peroneus (left)</b>  | No potential detectable    |       |                                       |       |                                       |       |                                     |       |                                         |       |
| <b>N. suralis (right)</b>  | No potential detectable    |       |                                       |       |                                       |       |                                     |       |                                         |       |
| <b>N. suralis (left)</b>   | No potential detectable    |       |                                       |       |                                       |       |                                     |       |                                         |       |

#### Study Patient 2

|                            | Motor                      |       |                                       |       |                                       |       | Sensory                             |       |                                         |       |
|----------------------------|----------------------------|-------|---------------------------------------|-------|---------------------------------------|-------|-------------------------------------|-------|-----------------------------------------|-------|
|                            | Distal motor latency (m/s) |       | Compound muscle action potential (mV) |       | Motor nerve conduction velocity (m/s) |       | Sensory nerve action potential (µV) |       | Sensory nerve conduction velocity (m/s) |       |
|                            | ULV                        | Value | LLV                                   | Value | LLV                                   | Value | LLV                                 | Value | LLV                                     | Value |
| <b>N. medianus (right)</b> | 4.2                        | 5.63  | 8.0                                   | 3.7   | 48 – 55                               | 53.7  | 12.0                                | 9.8   | 45.0                                    | 32.2  |
| <b>N. peroneus (left)</b>  | 5.6                        | 4.12  | 5.0                                   | 2.1   | 42.0                                  | 37.1  | 10.0                                | /     | 40.0                                    | /     |
| <b>N. suralis (right)</b>  | -                          | -     | -                                     | -     | -                                     | -     | 10.0                                | 1.44  | 42.0                                    | 39.5  |
| <b>N. tibialis (right)</b> | 6.0                        | 3.68  | 8.0                                   | 2.7   | 40.0                                  | 33.4  | -                                   | -     | -                                       | -     |

#### Study Patient 3

|                            | Motor                      |       |                                       |       |                                       |       | Sensory                             |       |                                         |       |
|----------------------------|----------------------------|-------|---------------------------------------|-------|---------------------------------------|-------|-------------------------------------|-------|-----------------------------------------|-------|
|                            | Distal motor latency (m/s) |       | Compound muscle action potential (mV) |       | Motor nerve conduction velocity (m/s) |       | Sensory nerve action potential (µV) |       | Sensory nerve conduction velocity (m/s) |       |
|                            | ULV                        | Value | LLV                                   | Value | LLV                                   | Value | LLV                                 | Value | LLV                                     | Value |
| <b>N. medianus (right)</b> | 4.2                        | 3.3   | 8.0                                   | 11.5  | 48 – 55                               | 47    | 8.0                                 | 7.9   | 48.0                                    | 57    |
| <b>N. tibialis (right)</b> | 6.0                        | 4.1   | 8.0                                   | 2.5   | 40.0                                  | 35    | -                                   | -     | -                                       | -     |
| <b>N. peroneus (left)</b>  | 5.6                        | 5.0   | 5.0                                   | 6.4   | 40.0                                  | 31    | 10.0                                | /     | 40.0                                    | /     |
| <b>N. suralis (right)</b>  | -                          | -     | -                                     | -     | -                                     | -     | No potential detectable             |       |                                         |       |

### Study Patient 4

|                            | Motor                      |       |                                       |       |                                       |       | Sensory                             |       |                                         |       |
|----------------------------|----------------------------|-------|---------------------------------------|-------|---------------------------------------|-------|-------------------------------------|-------|-----------------------------------------|-------|
|                            | Distal motor latency (m/s) |       | Compound muscle action potential (mV) |       | Motor nerve conduction velocity (m/s) |       | Sensory nerve action potential (µV) |       | Sensory nerve conduction velocity (m/s) |       |
|                            | ULV                        | Value | LLV                                   | Value | LLV                                   | Value | LLV                                 | Value | LLV                                     | Value |
| <b>N. ulnaris (right)</b>  | 3.5                        | 2.9   | 8.0                                   | 14.9  | 50 – 55                               | 51.0  | 15.0                                | 20.1  | 50.0                                    | 45.0  |
| <b>N. ulnaris (left)</b>   | 3.5                        | 3.0   | 8.0                                   | 8.2   | 50 – 55                               | 53.3  | 15.0                                | 14.0  | 50.0                                    | 44.0  |
| <b>N. tibialis (right)</b> | No potential detectable    |       |                                       |       |                                       |       |                                     |       |                                         |       |
| <b>N. tibialis (left)</b>  | No potential detectable    |       |                                       |       |                                       |       |                                     |       |                                         |       |
| <b>N. peroneus (right)</b> | No potential detectable    |       |                                       |       |                                       |       |                                     |       |                                         |       |
| <b>N. peroneus (left)</b>  | No potential detectable    |       |                                       |       |                                       |       |                                     |       |                                         |       |
| <b>N. suralis (right)</b>  | No potential detectable    |       |                                       |       |                                       |       |                                     |       |                                         |       |
| <b>N. suralis (left)</b>   | No potential detectable    |       |                                       |       |                                       |       |                                     |       |                                         |       |

### Study Patient 5

|                            | Motor                      |     |                                       |     |                                       |     | Sensory                             |      |                                         |     |
|----------------------------|----------------------------|-----|---------------------------------------|-----|---------------------------------------|-----|-------------------------------------|------|-----------------------------------------|-----|
|                            | Distal motor latency (m/s) |     | Compound muscle action potential (mV) |     | Motor nerve conduction velocity (m/s) |     | Sensory nerve action potential (µV) |      | Sensory nerve conduction velocity (m/s) |     |
|                            | ULV                        | IST | LLV                                   | IST | LLV                                   | IST | LLV                                 | IST  | LLV                                     | IST |
| <b>N. medianus (left)</b>  | 4.2                        | 4.4 | 8.0                                   | 3.7 | 48 – 55                               | 40  | 8.0                                 | 13.8 | 48.0                                    | 39  |
| <b>N. tibialis (right)</b> | No potential detectable    |     |                                       |     |                                       |     |                                     |      |                                         |     |
| <b>N. peroneus (left)</b>  | No potential detectable    |     |                                       |     |                                       |     | 10.0                                | /    | 40.0                                    | /   |
| <b>N. suralis (right)</b>  | -                          | -   | -                                     | -   | -                                     | -   | 4.0                                 | /    | 40.0                                    | /   |

### Study Patient 6

|                            | Motor                      |       |                                       |       |                                       |       | Sensory                             |       |                                         |       |
|----------------------------|----------------------------|-------|---------------------------------------|-------|---------------------------------------|-------|-------------------------------------|-------|-----------------------------------------|-------|
|                            | Distal motor latency (m/s) |       | Compound muscle action potential (mV) |       | Motor nerve conduction velocity (m/s) |       | Sensory nerve action potential (µV) |       | Sensory nerve conduction velocity (m/s) |       |
|                            | ULV                        | Value | LLV                                   | Value | LLV                                   | Value | LLV                                 | Value | LLV                                     | Value |
| <b>N. ulnaris (right)</b>  | 3.5                        | 2.6   | 8.0                                   | 11.0  | 50 – 55                               | 50    | 15.0                                | 29    | 50.0                                    | 49    |
| <b>N. tibialis (right)</b> | 6.0                        | 4.9   | 8.0                                   | 13.7  | 40.0                                  | 31    | -                                   | -     | -                                       | -     |
| <b>N. tibialis (left)</b>  | 6.0                        | 4.5   | 8.0                                   | 12.6  | 40.0                                  | 36    | -                                   | -     | -                                       | -     |
| <b>N. peroneus (right)</b> | No potential detectable    |       |                                       |       |                                       |       | 10.0                                | /     | 40.0                                    | /     |
| <b>N. peroneus (left)</b>  | 5.6                        | 5.75  | 5.0                                   | 0.28  | 42.0                                  | 28    | 10.0                                | /     | 40.0                                    | /     |
| <b>N. suralis (right)</b>  | -                          | -     | -                                     | -     | -                                     | -     | 10.0                                | 9.7   | 42.0                                    | 35    |
| <b>N. suralis (left)</b>   | -                          | -     | -                                     | -     | -                                     | -     | 10.0                                | 6.0   | 42.0                                    | 31    |

### Study Patient 7

|                            | Motor                      |       |                                       |       |                                       |       | Sensory                             |       |                                         |       |
|----------------------------|----------------------------|-------|---------------------------------------|-------|---------------------------------------|-------|-------------------------------------|-------|-----------------------------------------|-------|
|                            | Distal motor latency (m/s) |       | Compound muscle action potential (mV) |       | Motor nerve conduction velocity (m/s) |       | Sensory nerve action potential (µV) |       | Sensory nerve conduction velocity (m/s) |       |
|                            | ULV                        | Value | LLV                                   | Value | LLV                                   | Value | LLV                                 | Value | LLV                                     | Value |
| <b>N. ulnaris (right)</b>  | 3.5                        | 2.3   | 8.0                                   | 15.0  | 50 – 55                               | 51    | 15.0                                | 6.0   | 50.0                                    | 57    |
| <b>N. tibialis (right)</b> | 6.0                        | 3.5   | 8.0                                   | 12.8  | 40.0                                  | 43.3  | -                                   | -     | -                                       | -     |
| <b>N. tibialis (left)</b>  | 6.0                        | 3.8   | 8.0                                   | 16.4  | 40.0                                  | 43.6  | -                                   | -     | -                                       | -     |
| <b>N. peroneus (right)</b> | 5.6                        | 3.6   | 5.0                                   | 3.4   | 42.0                                  | 39.4  | 10.0                                | /     | 40.0                                    | /     |
| <b>N. peroneus (left)</b>  | 5.6                        | 3.8   | 5.0                                   | 5.5   | 42.0                                  | 41    | 10.0                                | /     | 40.0                                    | /     |
| <b>N. suralis (right)</b>  | -                          | -     | -                                     | -     | -                                     | -     | 10.0                                | 7.2   | 42.0                                    | 55.3  |
| <b>N. suralis (left)</b>   | -                          | -     | -                                     | -     | -                                     | -     | 10.0                                | 6.0   | 42.0                                    | 38    |

### Study Patient 8

|                            | Motor                      |       |                                       |       |                                       |       | Sensory                             |       |                                         |       |
|----------------------------|----------------------------|-------|---------------------------------------|-------|---------------------------------------|-------|-------------------------------------|-------|-----------------------------------------|-------|
|                            | Distal motor latency (m/s) |       | Compound muscle action potential (mV) |       | Motor nerve conduction velocity (m/s) |       | Sensory nerve action potential (µV) |       | Sensory nerve conduction velocity (m/s) |       |
|                            | ULV                        | Value | LLV                                   | Value | LLV                                   | Value | LLV                                 | Value | LLV                                     | Value |
| <b>N. medianus (right)</b> | 4.2                        | 3.7   | 8.0                                   | 6.8   | 48 – 55                               | 29    | 8.0                                 | n.a.  | 48.0                                    | n.a.  |
| <b>N. tibialis (right)</b> | 6.0                        | 4.0   | 8.0                                   | 1.4   | 40.0                                  | 36    | -                                   | -     | -                                       | -     |
| <b>N. peroneus (left)</b>  | 5.6                        | 3.7   | 5.0                                   | 0.3   | 40.0                                  | 35    | 10.0                                | /     | 40.0                                    | /     |
| <b>N. suralis (right)</b>  | -                          | -     | -                                     | -     | -                                     | -     | 4.0                                 | 4.0   | 40.0                                    | 38    |

### Study Patient 9

|                            | Motor                      |       |                                       |       |                                       |       | Sensory                             |       |                                         |       |
|----------------------------|----------------------------|-------|---------------------------------------|-------|---------------------------------------|-------|-------------------------------------|-------|-----------------------------------------|-------|
|                            | Distal motor latency (m/s) |       | Compound muscle action potential (mV) |       | Motor nerve conduction velocity (m/s) |       | Sensory nerve action potential (µV) |       | Sensory nerve conduction velocity (m/s) |       |
|                            | ULV                        | Value | LLV                                   | Value | LLV                                   | Value | LLV                                 | Value | LLV                                     | Value |
| <b>N. ulnaris (right)</b>  | 3.5                        | 3.62  | 8.0                                   | 12.6  | 50 – 55                               | 50.2  | 15.0                                | 10.2  | 50.0                                    | 46    |
| <b>N. tibialis (right)</b> | 6.0                        | 5.6   | 8.0                                   | 6.8   | 40.0                                  | 41    | -                                   | -     | -                                       | -     |
| <b>N. tibialis (left)</b>  | 6.0                        | 3.2   | 8.0                                   | 4.2   | 40.0                                  | 38    | -                                   | -     | -                                       | -     |
| <b>N. peroneus (right)</b> | 5.6                        | 4.2   | 5.0                                   | 7.0   | 42.0                                  | 39    | 10.0                                | /     | 40.0                                    | /     |
| <b>N. peroneus (left)</b>  | 5.6                        | 2.8   | 5.0                                   | 3.1   | 42.0                                  | 36.4  | 10.0                                | /     | 40.0                                    | /     |
| <b>N. suralis (right)</b>  | -                          | -     | -                                     | -     | -                                     | -     | 10.0                                | 6.0   | 42.0                                    | 33    |
| <b>N. suralis (left)</b>   | -                          | -     | -                                     | -     | -                                     | -     | 10.0                                | 3.0   | 42.0                                    | 31    |

### Study Patient 10

|                            | Motor                      |       |                                       |       |                                       |       | Sensory                             |       |                                         |       |
|----------------------------|----------------------------|-------|---------------------------------------|-------|---------------------------------------|-------|-------------------------------------|-------|-----------------------------------------|-------|
|                            | Distal motor latency (m/s) |       | Compound muscle action potential (mV) |       | Motor nerve conduction velocity (m/s) |       | Sensory nerve action potential (µV) |       | Sensory nerve conduction velocity (m/s) |       |
|                            | ULV                        | Value | LLV                                   | Value | LLV                                   | Value | LLV                                 | Value | LLV                                     | Value |
| <b>N. ulnaris (right)</b>  | 3.5                        | 3.1   | 8.0                                   | 9.9   | 50 – 55                               | 55.6  | 15.0                                | 19.0  | 50.0                                    | 52.7  |
| <b>N. tibialis (right)</b> | 6.0                        | 3.0   | 8.0                                   | 4.4   | 40.0                                  | 45.8  | -                                   | -     | -                                       | -     |
| <b>N. tibialis (left)</b>  | 6.0                        | 4.2   | 8.0                                   | 2.3   | 40.0                                  | 56.2  | -                                   | -     | -                                       | -     |
| <b>N. peroneus (right)</b> | 5.6                        | 4.5   | 5.0                                   | 0.3   | 42.0                                  | 53.8  | 10.0                                | /     | 40.0                                    | /     |
| <b>N. peroneus (left)</b>  | No potential detectable    |       |                                       |       |                                       |       | 10.0                                | /     | 40.0                                    | /     |
| <b>N. suralis (right)</b>  | -                          | -     | -                                     | -     | -                                     | -     | 10.0                                | 7.9   | 42.0                                    | 51.5  |
| <b>N. suralis (left)</b>   | -                          | -     | -                                     | -     | -                                     | -     | 10.0                                | 4.9   | 42.0                                    | 50.5  |

### Study Patient 11

|                            | Motor                      |       |                                       |       |                                       |       | Sensory                             |       |                                         |       |   |
|----------------------------|----------------------------|-------|---------------------------------------|-------|---------------------------------------|-------|-------------------------------------|-------|-----------------------------------------|-------|---|
|                            | Distal motor latency (m/s) |       | Compound muscle action potential (mV) |       | Motor nerve conduction velocity (m/s) |       | Sensory nerve action potential (µV) |       | Sensory nerve conduction velocity (m/s) |       |   |
|                            | ULV                        | Value | LLV                                   | Value | LLV                                   | Value | LLV                                 | Value | LLV                                     | Value |   |
| <b>N. ulnaris (right)</b>  | 3.5                        | 8.1   | 8.0                                   | 0.1   | 50 – 55                               | 19.0  | 15.0                                | n.a.  | 50.0                                    | n.a.  |   |
| <b>N. ulnaris (left)</b>   | 3.5                        | 8.4   | 8.0                                   | 0.1   | 50 – 55                               | 15.0  | 15.0                                | n.a.  | 50.0                                    | n.a.  |   |
| <b>N. tibialis (right)</b> | No potential detectable    |       |                                       |       |                                       |       | -                                   | -     | -                                       | -     |   |
| <b>N. tibialis (left)</b>  | No potential detectable    |       |                                       |       |                                       |       | -                                   | -     | -                                       | -     |   |
| <b>N. peroneus (right)</b> | No potential detectable    |       |                                       |       |                                       |       | -                                   | 10.0  | /                                       | 40.0  | / |
| <b>N. peroneus (left)</b>  | No potential detectable    |       |                                       |       |                                       |       | -                                   | 10.0  | /                                       | 40.0  | / |
| <b>N. suralis (right)</b>  | -                          | -     | -                                     | -     | -                                     | -     | 10.0                                | n.a.  | 42.0                                    | n.a.  |   |
| <b>N. suralis (left)</b>   | -                          | -     | -                                     | -     | -                                     | -     | 10.0                                | n.a.  | 42.0                                    | n.a.  |   |

### Study Patient 12

|                            | Motor                      |       |                                       |       |                                       |       | Sensory                             |       |                                         |       |
|----------------------------|----------------------------|-------|---------------------------------------|-------|---------------------------------------|-------|-------------------------------------|-------|-----------------------------------------|-------|
|                            | Distal motor latency (m/s) |       | Compound muscle action potential (mV) |       | Motor nerve conduction velocity (m/s) |       | Sensory nerve action potential (µV) |       | Sensory nerve conduction velocity (m/s) |       |
|                            | ULV                        | Value | LLV                                   | Value | LLV                                   | Value | LLV                                 | Value | LLV                                     | Value |
| <b>N. ulnaris (right)</b>  | 3.5                        | 3.4   | 8.0                                   | 12    | 50 – 55                               | 39    | 15.0                                |       | 50.0                                    |       |
| <b>N. tibialis (right)</b> | 6.0                        | 4.4   | 8.0                                   | 5.2   | 40.0                                  | 33    | -                                   | -     | -                                       | -     |
| <b>N. tibialis (left)</b>  | 6.0                        | 4.3   | 8.0                                   | 4.2   | 40.0                                  | 33    | -                                   | -     | -                                       | -     |
| <b>N. peroneus (right)</b> | 5.6                        | n.a.  | 5.0                                   | n.a.  | 42.0                                  | n.a.  | 10.0                                | /     | 40.0                                    | /     |
| <b>N. peroneus (left)</b>  | 5.6                        | 6.5   | 5.0                                   | 0.7   | 42.0                                  | 33    | 10.0                                | /     | 40.0                                    | /     |
| <b>N. suralis (right)</b>  | -                          | -     | -                                     | -     | -                                     | -     | 10.0                                | n.a.  | 42.0                                    | n.a.  |
| <b>N. suralis (left)</b>   | -                          | -     | -                                     | -     | -                                     | -     | 10.0                                | 6.0   | 42.0                                    | 30    |

### Study Patient 13

|                            | Motor                      |       |                                       |       |                                       |       | Sensory                             |       |                                         |       |
|----------------------------|----------------------------|-------|---------------------------------------|-------|---------------------------------------|-------|-------------------------------------|-------|-----------------------------------------|-------|
|                            | Distal motor latency (m/s) |       | Compound muscle action potential (mV) |       | Motor nerve conduction velocity (m/s) |       | Sensory nerve action potential (µV) |       | Sensory nerve conduction velocity (m/s) |       |
|                            | ULV                        | Value | LLV                                   | Value | LLV                                   | Value | LLV                                 | Value | LLV                                     | Value |
| <b>N. ulnaris (right)</b>  | 3.5                        | 3.9   | 8.0                                   | 8     | 50 – 55                               | 41    | 15.0                                | 5     | 50.0                                    | 42    |
| <b>N. tibialis (right)</b> | 6.0                        | n.a.  | 8.0                                   | n.a.  | 40.0                                  | -     | -                                   | -     | -                                       | -     |
| <b>N. tibialis (left)</b>  | 6.0                        | n.a.  | 8.0                                   | n.a.  | 40.0                                  | -     | -                                   | -     | -                                       | -     |
| <b>N. peroneus (right)</b> | 5.6                        | n.a.  | 5.0                                   | n.a.  | 42.0                                  | -     | 10.0                                | /     | 40.0                                    | /     |
| <b>N. peroneus (left)</b>  | 5.6                        | n.a.  | 5.0                                   | n.a.  | 42.0                                  | -     | 10.0                                | /     | 40.0                                    | /     |
| <b>N. suralis (right)</b>  | -                          | -     | -                                     | -     | -                                     | -     | 10.0                                | -     | 42.0                                    | -     |
| <b>N. suralis (left)</b>   | -                          | -     | -                                     | -     | -                                     | -     | 10.0                                | -     | 42.0                                    | -     |

### Study Patient 14

|                            | Motor                      |       |                                       |       |                                       |       | Sensory                             |       |                                         |       |
|----------------------------|----------------------------|-------|---------------------------------------|-------|---------------------------------------|-------|-------------------------------------|-------|-----------------------------------------|-------|
|                            | Distal motor latency (m/s) |       | Compound muscle action potential (mV) |       | Motor nerve conduction velocity (m/s) |       | Sensory nerve action potential (µV) |       | Sensory nerve conduction velocity (m/s) |       |
|                            | ULV                        | Value | LLV                                   | Value | LLV                                   | Value | LLV                                 | Value | LLV                                     | Value |
| <b>N. ulnaris (right)</b>  | 3.5                        | 4.1   | 8.0                                   | 10.4  | 50 – 55                               | 62.1  | 15.0                                | 2.3   | 50.0                                    | 38.0  |
| <b>N. tibialis (right)</b> | 6.0                        | 5.6   | 8.0                                   | 3.6   | 40.0                                  | 34.0  | -                                   | -     | -                                       | -     |
| <b>N. tibialis (left)</b>  | 6.0                        | 5.4   | 8.0                                   | 1.4   | 40.0                                  | 35.5  | -                                   | -     | -                                       | -     |
| <b>N. peroneus (right)</b> | 5.6                        | 4.1   | 5.0                                   | 0.8   | 42.0                                  | 31.0  | 10.0                                | /     | 40.0                                    | /     |
| <b>N. peroneus (left)</b>  | 5.6                        | 4.5   | 5.0                                   | 0.2   | 42.0                                  | 30.0  | 10.0                                | /     | 40.0                                    | /     |
| <b>N. suralis (right)</b>  | -                          | -     | -                                     | -     | -                                     | -     | 10.0                                | 2.7   | 42.0                                    | 38.0  |
| <b>N. suralis (left)</b>   | -                          | -     | -                                     | -     | -                                     | -     | 10.0                                | 2.4   | 42.0                                    | 37.5  |

### Study Patient 15

|                            | Motor                      |       |                                       |       |                                       |       | Sensory                             |       |                                         |       |
|----------------------------|----------------------------|-------|---------------------------------------|-------|---------------------------------------|-------|-------------------------------------|-------|-----------------------------------------|-------|
|                            | Distal motor latency (m/s) |       | Compound muscle action potential (mV) |       | Motor nerve conduction velocity (m/s) |       | Sensory nerve action potential (µV) |       | Sensory nerve conduction velocity (m/s) |       |
|                            | ULV                        | Value | LLV                                   | Value | LLV                                   | Value | LLV                                 | Value | LLV                                     | Value |
| <b>N. medianus (right)</b> | 4.2                        | 5.5   | 8.0                                   | 3.2   | 48 – 55                               | 32    | 8.0                                 | 0.8   | 48.0                                    | 28    |
| <b>N. tibialis (right)</b> | 6.0                        | 3.6   | 8.0                                   | 3.1   | 40.0                                  | 39    | -                                   | -     | -                                       | -     |
| <b>N. peroneus (left)</b>  | 5.6                        | 4.4   | 4.0                                   | 2.1   | 40.0                                  | 47    | 10.0                                | /     | 40.0                                    | /     |
| <b>N. suralis (right)</b>  | -                          | -     | -                                     | -     | -                                     | -     | 4.0                                 | 3.7   | 40.0                                    | 45    |

### Study Patient 16

|                            | Motor                      |       |                                       |       |                                       |       | Sensory                             |       |                                         |       |
|----------------------------|----------------------------|-------|---------------------------------------|-------|---------------------------------------|-------|-------------------------------------|-------|-----------------------------------------|-------|
|                            | Distal motor latency (m/s) |       | Compound muscle action potential (mV) |       | Motor nerve conduction velocity (m/s) |       | Sensory nerve action potential (µV) |       | Sensory nerve conduction velocity (m/s) |       |
|                            | ULV                        | Value | LLV                                   | Value | LLV                                   | Value | LLV                                 | Value | LLV                                     | Value |
| <b>N. medianus (right)</b> | 4.2                        | 3.1   | 8.0                                   | 3.6   | 48 – 55                               | 49    | 8.0                                 | 15.8  | 48.0                                    | 53.1  |
| <b>N. tibialis (right)</b> | 6.0                        | 3.3   | 8.0                                   | 6.8   | 40.0                                  | 43    | -                                   | -     | -                                       | -     |
| <b>N. peroneus (left)</b>  | 5.6                        | 4.2   | 4.0                                   | 0.25  | 40.0                                  | 49.4  | 10.0                                | /     | 40.0                                    | /     |
| <b>N. suralis (right)</b>  | -                          | -     | -                                     | -     | -                                     | -     | 4.0                                 | 9.5   | 40.0                                    | 55.3  |

### Study Patient 17

|                            | Motor                      |       |                                       |       |                                       |       | Sensory                             |       |                                         |       |
|----------------------------|----------------------------|-------|---------------------------------------|-------|---------------------------------------|-------|-------------------------------------|-------|-----------------------------------------|-------|
|                            | Distal motor latency (m/s) |       | Compound muscle action potential (mV) |       | Motor nerve conduction velocity (m/s) |       | Sensory nerve action potential (µV) |       | Sensory nerve conduction velocity (m/s) |       |
|                            | ULV                        | Value | LLV                                   | Value | LLV                                   | Value | LLV                                 | Value | LLV                                     | Value |
| <b>N. medianus (right)</b> | 4.2                        | 3.6   | 8.0                                   | 4.5   | 48 – 55                               | 47    | 8.0                                 | 19.1  | 48.0                                    | 55    |
| <b>N. medianus (left)</b>  | 4.2                        | 3.3   | 8.0                                   | 3.9   | 48 – 55                               | 48    | 8.0                                 | 15.6  | 48.0                                    | 53    |
| <b>N. tibialis (right)</b> | 6.0                        | 5.4   | 8.0                                   | 0.3   | 40.0                                  | 37    | -                                   | -     | -                                       | -     |
| <b>N. peroneus (left)</b>  | No potential detectable    |       |                                       |       |                                       |       | 10.0                                | /     | 40.0                                    | /     |
| <b>N. suralis (left)</b>   | -                          | -     | -                                     | -     | -                                     | -     | No potential detectable             |       |                                         |       |

### Study Patient 18

|                            | Motor                      |       |                                       |       |                                       |       | Sensory                             |       |                                         |       |
|----------------------------|----------------------------|-------|---------------------------------------|-------|---------------------------------------|-------|-------------------------------------|-------|-----------------------------------------|-------|
|                            | Distal motor latency (m/s) |       | Compound muscle action potential (mV) |       | Motor nerve conduction velocity (m/s) |       | Sensory nerve action potential (µV) |       | Sensory nerve conduction velocity (m/s) |       |
|                            | ULV                        | Value | LLV                                   | Value | LLV                                   | Value | LLV                                 | Value | LLV                                     | Value |
| <b>N. medianus (right)</b> | 4.2                        | 4.34  | 8.0                                   | 6.6   | 48 – 55                               | 42.9  | 12.0                                | 4.9   | 45.0                                    | 47.6  |
| <b>N. peroneus (left)</b>  | 5.6                        | 3.85  | 5.0                                   | 1.25  | 42.0                                  | 34.8  | 10.0                                | /     | 40.0                                    | /     |
| <b>N. suralis (right)</b>  | -                          | -     | -                                     | -     | -                                     | -     | 10.0                                | 3.7   | 42.0                                    | 42.0  |
| <b>N. tibialis (right)</b> | 6.0                        | 3.79  | 8.0                                   | 2.0   | 40.0                                  | 36.4  | -                                   | -     | -                                       | -     |

### Study Patient 19

|                            | Motor                      |       |                                       |       |                                       |       | Sensory                             |       |                                         |       |
|----------------------------|----------------------------|-------|---------------------------------------|-------|---------------------------------------|-------|-------------------------------------|-------|-----------------------------------------|-------|
|                            | Distal motor latency (m/s) |       | Compound muscle action potential (mV) |       | Motor nerve conduction velocity (m/s) |       | Sensory nerve action potential (µV) |       | Sensory nerve conduction velocity (m/s) |       |
|                            | ULV                        | Value | LLV                                   | Value | LLV                                   | Value | LLV                                 | Value | LLV                                     | Value |
| <b>N. ulnaris (right)</b>  | 3.5                        | 2.7   | 8.0                                   | 8.3   | 50 – 55                               | 51.0  | 15.0                                | 17.5  | 50.0                                    | 42.7  |
| <b>N. tibialis (right)</b> | 6.0                        | 3.8   | 8.0                                   | 7.4   | 40.0                                  | 36.0  | -                                   | -     | -                                       | -     |
| <b>N. tibialis (left)</b>  | 6.0                        | 4.2   | 8.0                                   | 5.7   | 40.0                                  | 34.0  | -                                   | -     | -                                       | -     |
| <b>N. peroneus (right)</b> | 5.6                        | 4.7   | 5.0                                   | 0.4   | 42.0                                  | 31.0  | 10.0                                | /     | 40.0                                    | /     |
| <b>N. peroneus (left)</b>  | 5.6                        | 4.8   | 5.0                                   | 0.9   | 42.0                                  | 32.0  | 10.0                                | /     | 40.0                                    | /     |
| <b>N. suralis (right)</b>  | -                          | -     | -                                     | -     | -                                     | -     | 10.0                                | 9.0   | 42.0                                    | 35.0  |
| <b>N. suralis (left)</b>   | -                          | -     | -                                     | -     | -                                     | -     | 10.0                                | 9.3   | 42.0                                    | 39.0  |

### Study Patient 20

|                            | Motor                      |       |                                       |       |                                       |       | Sensory                             |       |                                         |       |
|----------------------------|----------------------------|-------|---------------------------------------|-------|---------------------------------------|-------|-------------------------------------|-------|-----------------------------------------|-------|
|                            | Distal motor latency (m/s) |       | Compound muscle action potential (mV) |       | Motor nerve conduction velocity (m/s) |       | Sensory nerve action potential (µV) |       | Sensory nerve conduction velocity (m/s) |       |
|                            | ULV                        | Value | LLV                                   | Value | LLV                                   | Value | LLV                                 | Value | LLV                                     | Value |
| <b>N. ulnaris (right)</b>  | 3.5                        | 1.72  | 8.0                                   | 9.5   | 50 – 55                               | 53.3  | 15.0                                | 18.4  | 50.0                                    | 54.3  |
| <b>N. tibialis (right)</b> | 6.0                        | 2.63  | 8.0                                   | 8.9   | 40.0                                  | 54.6  | -                                   | -     | -                                       | -     |
| <b>N. tibialis (left)</b>  | 6.0                        | 2.93  | 8.0                                   | 5.1   | 40.0                                  | 49.5  | -                                   | -     | -                                       | -     |
| <b>N. peroneus (right)</b> | 5.6                        | 3.53  | 5.0                                   | 2.2   | 42.0                                  | 42.2  | 10.0                                | /     | 40.0                                    | /     |
| <b>N. peroneus (left)</b>  | 5.6                        | 3.42  | 5.0                                   | 1.82  | 42.0                                  | 39.7  | 10.0                                | /     | 40.0                                    | /     |
| <b>N. suralis (right)</b>  | -                          | -     | -                                     | -     | -                                     | -     | 10.0                                | 2.2   | 42.0                                    | 42.2  |
| <b>N. suralis (left)</b>   | -                          | -     | -                                     | -     | -                                     | -     | 10.0                                | 2.9   | 42.0                                    | 58.5  |

### Study Patient 21

|                            | Motor                      |       |                                       |       |                                       |       | Sensory                             |       |                                         |       |
|----------------------------|----------------------------|-------|---------------------------------------|-------|---------------------------------------|-------|-------------------------------------|-------|-----------------------------------------|-------|
|                            | Distal motor latency (m/s) |       | Compound muscle action potential (mV) |       | Motor nerve conduction velocity (m/s) |       | Sensory nerve action potential (µV) |       | Sensory nerve conduction velocity (m/s) |       |
|                            | ULV                        | Value | LLV                                   | Value | LLV                                   | Value | LLV                                 | Value | LLV                                     | Value |
| <b>N. ulnaris (right)</b>  | 3.5                        | 3.0   | 8.0                                   | 14    | 50 – 55                               | 52    | 15.0                                | 21    | 50.0                                    | 53    |
| <b>N. tibialis (right)</b> | 6.0                        | 4.5   | 8.0                                   | 16.5  | 40.0                                  | 48    | -                                   | -     | -                                       | -     |
| <b>N. tibialis (left)</b>  | 6.0                        | 4.4   | 8.0                                   | 13    | 40.0                                  | 42    | -                                   | -     | -                                       | -     |
| <b>N. peroneus (right)</b> | 5.6                        | 4.0   | 5.0                                   | 7.8   | 42.0                                  | 42    | 10.0                                | /     | 40.0                                    | /     |
| <b>N. peroneus (left)</b>  | 5.6                        | 5.8   | 5.0                                   | 1.4   | 42.0                                  | 44    | 10.0                                | /     | 40.0                                    | /     |
| <b>N. suralis (right)</b>  | No potential detectable    |       |                                       |       |                                       |       |                                     |       |                                         |       |
| <b>N. suralis (left)</b>   | No potential detectable    |       |                                       |       |                                       |       |                                     |       |                                         |       |

### Study Patient 22

|                            | Motor                      |       |                                       |       |                                       |       | Sensory                             |       |                                         |       |
|----------------------------|----------------------------|-------|---------------------------------------|-------|---------------------------------------|-------|-------------------------------------|-------|-----------------------------------------|-------|
|                            | Distal motor latency (m/s) |       | Compound muscle action potential (mV) |       | Motor nerve conduction velocity (m/s) |       | Sensory nerve action potential (µV) |       | Sensory nerve conduction velocity (m/s) |       |
|                            | ULV                        | Value | LLV                                   | Value | LLV                                   | Value | LLV                                 | Value | LLV                                     | Value |
| <b>N. ulnaris (right)</b>  | 3.5                        | 2.3   | 8.0                                   | 7     | 50 – 55                               | 45    | 15.0                                | 8.2   | 50.0                                    | 52    |
| <b>N. tibialis (right)</b> | 6.0                        | 3.1   | 8.0                                   | 9     | 40.0                                  | 36    | -                                   | -     | -                                       | -     |
| <b>N. tibialis (left)</b>  | 6.0                        | 3.7   | 8.0                                   | 3.5   | 40.0                                  | 38    | -                                   | -     | -                                       | -     |
| <b>N. peroneus (right)</b> | 5.6                        | 2.8   | 5.0                                   | 0.4   | 42.0                                  | 27    | 10.0                                | /     | 40.0                                    | /     |
| <b>N. peroneus (left)</b>  | No potential detectable    |       |                                       |       |                                       |       |                                     |       |                                         |       |
| <b>N. suralis (right)</b>  | -                          | -     | -                                     | -     | -                                     | -     | 10.0                                | 1.7   | 42.0                                    | 33.2  |
| <b>N. suralis (left)</b>   | No potential detectable    |       |                                       |       |                                       |       |                                     |       |                                         |       |

### Study Patient 23

|                            | Motor                      |       |                                       |       |                                       |       | Sensory                             |       |                                         |       |
|----------------------------|----------------------------|-------|---------------------------------------|-------|---------------------------------------|-------|-------------------------------------|-------|-----------------------------------------|-------|
|                            | Distal motor latency (m/s) |       | Compound muscle action potential (mV) |       | Motor nerve conduction velocity (m/s) |       | Sensory nerve action potential (µV) |       | Sensory nerve conduction velocity (m/s) |       |
|                            | ULV                        | Value | LLV                                   | Value | LLV                                   | Value | LLV                                 | Value | LLV                                     | Value |
| <b>N. ulnaris (right)</b>  | 3.5                        | 1.7   | 8.0                                   | 11.4  | 50 – 55                               | 43.5  | 15.0                                | 12    | 50.0                                    | 49    |
| <b>N. tibialis (right)</b> | 6.0                        | 2.9   | 8.0                                   | 10    | 40.0                                  | 43    | -                                   | -     | -                                       | -     |
| <b>N. tibialis (left)</b>  | 6.0                        | 2.4   | 8.0                                   | 9.6   | 40.0                                  | 40    | -                                   | -     | -                                       | -     |
| <b>N. peroneus (right)</b> | 5.6                        | 3.4   | 5.0                                   | 3     | 42.0                                  | 46    | 10.0                                | /     | 40.0                                    | /     |
| <b>N. peroneus (left)</b>  | 5.6                        | 3.3   | 5.0                                   | 1.2   | 42.0                                  | 42    | 10.0                                | /     | 40.0                                    | /     |
| <b>N. suralis (right)</b>  | -                          | -     | -                                     | -     | -                                     | -     | 10.0                                | 4.2   | 42.0                                    | 44    |
| <b>N. suralis (left)</b>   | -                          | -     | -                                     | -     | -                                     | -     | 10.0                                | 8     | 42.0                                    | 43    |

### Study Patient 24

|                            | Motor                      |       |                                       |       |                                       |       | Sensory                             |       |                                         |       |
|----------------------------|----------------------------|-------|---------------------------------------|-------|---------------------------------------|-------|-------------------------------------|-------|-----------------------------------------|-------|
|                            | Distal motor latency (m/s) |       | Compound muscle action potential (mV) |       | Motor nerve conduction velocity (m/s) |       | Sensory nerve action potential (µV) |       | Sensory nerve conduction velocity (m/s) |       |
|                            | ULV                        | Value | LLV                                   | Value | LLV                                   | Value | LLV                                 | Value | LLV                                     | Value |
| <b>N. medianus (right)</b> | 4.2                        | 3.54  | 8.0                                   | 2.9   | 48 – 55                               | 51.1  | 12.0                                | 3.7   | 45.0                                    | 52.0  |
| <b>N. peroneus (left)</b>  | 5.6                        | 5.38  | 5.0                                   | 0.78  | 42.0                                  | 41.4  | 10.0                                | /     | 40.0                                    | /     |
| <b>N. suralis (right)</b>  | -                          | -     | -                                     | -     | -                                     | -     | 10.0                                | 2.3   | 42.0                                    | 31.7  |
| <b>N. tibialis (right)</b> | 6.0                        | 5.07  | 8.0                                   | 2.7   | 40.0                                  | 36.7  | -                                   | -     | -                                       | -     |

### Study Patient 25

|                            | Motor                      |       |                                       |       |                                       |       | Sensory                             |       |                                         |       |
|----------------------------|----------------------------|-------|---------------------------------------|-------|---------------------------------------|-------|-------------------------------------|-------|-----------------------------------------|-------|
|                            | Distal motor latency (m/s) |       | Compound muscle action potential (mV) |       | Motor nerve conduction velocity (m/s) |       | Sensory nerve action potential (µV) |       | Sensory nerve conduction velocity (m/s) |       |
|                            | ULV                        | Value | LLV                                   | Value | LLV                                   | Value | LLV                                 | Value | LLV                                     | Value |
| <b>N. ulnaris (right)</b>  | 3.5                        | 2.0   | 8.0                                   | 10.0  | 50 – 55                               | 56.0  | 15.0                                | 6.5   | 50.0                                    | 50.0  |
| <b>N. tibialis (right)</b> | 6.0                        | 3.0   | 8.0                                   | 15.0  | 40.0                                  | 47.0  | -                                   | -     | -                                       | -     |
| <b>N. tibialis (left)</b>  | 6.0                        | 3.9   | 8.0                                   | 0.24  | 40.0                                  | 42.0  | -                                   | -     | -                                       | -     |
| <b>N. peroneus (right)</b> | 5.6                        | 2.8   | 5.0                                   | 2.9   | 42.0                                  | 42.0  | 10.0                                | /     | 40.0                                    | /     |
| <b>N. peroneus (left)</b>  | No potential detectable    |       |                                       |       |                                       |       |                                     |       |                                         |       |
| <b>N. suralis (right)</b>  | -                          | -     | -                                     | -     | -                                     | -     | 10.0                                | 4.4   | 42.0                                    | 48.0  |
| <b>N. suralis (left)</b>   | No potential detectable    |       |                                       |       |                                       |       |                                     |       |                                         |       |

### Study Patient 26

|                            | Motor                      |       |                                       |       |                                       |       | Sensory                             |       |                                         |       |
|----------------------------|----------------------------|-------|---------------------------------------|-------|---------------------------------------|-------|-------------------------------------|-------|-----------------------------------------|-------|
|                            | Distal motor latency (m/s) |       | Compound muscle action potential (mV) |       | Motor nerve conduction velocity (m/s) |       | Sensory nerve action potential (µV) |       | Sensory nerve conduction velocity (m/s) |       |
|                            | ULV                        | Value | LLV                                   | Value | LLV                                   | Value | LLV                                 | Value | LLV                                     | Value |
| <b>N. ulnaris (right)</b>  | 3.5                        | 3.0   | 8.0                                   | 8.0   | 50 – 55                               | 75.0  | 15.0                                | 29.0  | 50.0                                    | 42.5  |
| <b>N. tibialis (right)</b> | 6.0                        | 4.5   | 8.0                                   | 4.0   | 40.0                                  | 35.0  | -                                   | -     | -                                       | -     |
| <b>N. tibialis (left)</b>  | 6.0                        | 4.5   | 8.0                                   | 7.0   | 40.0                                  | 36.0  | -                                   | -     | -                                       | -     |
| <b>N. peroneus (right)</b> | No potential detectable    |       |                                       |       |                                       |       |                                     |       |                                         |       |
| <b>N. peroneus (left)</b>  | 5.6                        | 5.1   | 5.0                                   | 0.4   | 42.0                                  | 38.0  | 10.0                                | /     | 40.0                                    | /     |
| <b>N. suralis (right)</b>  | -                          | -     | -                                     | -     | -                                     | -     | 10.0                                | 1.0   | 42.0                                    | 34.5  |
| <b>N. suralis (left)</b>   | -                          | -     | -                                     | -     | -                                     | -     | 10.0                                | 2.2   | 42.0                                    | 38.0  |

### Study Patient 27

|                            | Motor                      |       |                                       |       |                                       |       | Sensory                             |       |                                         |       |
|----------------------------|----------------------------|-------|---------------------------------------|-------|---------------------------------------|-------|-------------------------------------|-------|-----------------------------------------|-------|
|                            | Distal motor latency (m/s) |       | Compound muscle action potential (mV) |       | Motor nerve conduction velocity (m/s) |       | Sensory nerve action potential (µV) |       | Sensory nerve conduction velocity (m/s) |       |
|                            | ULV                        | Value | LLV                                   | Value | LLV                                   | Value | LLV                                 | Value | LLV                                     | Value |
| <b>N. tibialis (left)</b>  | 6.0                        | 4.0   | 8.0                                   | 0.9   | 40.0                                  | 39.5  | -                                   | -     | -                                       | -     |
| <b>N. peroneus (left)</b>  | No potential detectable    |       |                                       |       |                                       |       | 10.0                                | /     | 40.0                                    | /     |
| <b>N. suralis (left)</b>   | No potential detectable    |       |                                       |       |                                       |       |                                     |       |                                         |       |
| <b>N. femoralis (left)</b> | No potential detectable    |       |                                       |       |                                       |       |                                     |       |                                         |       |

### Study Patient 28

|                            | Motor                      |       |                                       |       |                                       |       | Sensory                             |       |                                         |       |
|----------------------------|----------------------------|-------|---------------------------------------|-------|---------------------------------------|-------|-------------------------------------|-------|-----------------------------------------|-------|
|                            | Distal motor latency (m/s) |       | Compound muscle action potential (mV) |       | Motor nerve conduction velocity (m/s) |       | Sensory nerve action potential (µV) |       | Sensory nerve conduction velocity (m/s) |       |
|                            | ULV                        | Value | LLV                                   | Value | LLV                                   | Value | LLV                                 | Value | LLV                                     | Value |
| <b>N. medianus (right)</b> | 4.2                        | 2.84  | 8.0                                   | 1.98  | 48 – 55                               | 36.0  | 12.0                                | 9.1   | 45.0                                    | 46.3  |
| <b>N. peroneus (right)</b> | 5.6                        | 5.26  | 5.0                                   | 0.10  | 42.0                                  | 32.9  | 10.0                                | /     | 40.0                                    | /     |
| <b>N. suralis (right)</b>  | -                          | -     | -                                     | -     | -                                     | -     | 10.0                                | n.a.  | 42.0                                    | n.a.  |
| <b>N. tibialis (left)</b>  | No potential detectable    |       |                                       |       |                                       |       | -                                   | -     | -                                       | -     |

### Study Patient 29

|                            | Motor                      |       |                                       |       |                                       |       | Sensory                             |       |                                         |       |
|----------------------------|----------------------------|-------|---------------------------------------|-------|---------------------------------------|-------|-------------------------------------|-------|-----------------------------------------|-------|
|                            | Distal motor latency (m/s) |       | Compound muscle action potential (mV) |       | Motor nerve conduction velocity (m/s) |       | Sensory nerve action potential (µV) |       | Sensory nerve conduction velocity (m/s) |       |
|                            | ULV                        | Value | LLV                                   | Value | LLV                                   | Value | LLV                                 | Value | LLV                                     | Value |
| <b>N. medianus (right)</b> | 4.2                        | 4.30  | 8.0                                   | 7.0   | 48 – 55                               | 53.2  | 12.0                                | 17.8  | 45.0                                    | 43.6  |
| <b>N. peroneus (left)</b>  | 5.6                        | 4.22  | 5.0                                   | 0.13  | 42.0                                  | 32.0  | 10.0                                | /     | 40.0                                    | /     |
| <b>N. suralis (right)</b>  | -                          | -     | -                                     | -     | -                                     | -     | 10.0                                | 9.8   | 42.0                                    | 59.5  |
| <b>N. tibialis (right)</b> | 6.0                        | 3.03  | 8.0                                   | 10.4  | 40.0                                  | 44.5  | -                                   | -     | -                                       | -     |

### Study Patient 30

|                            | Motor                      |       |                                       |       |                                       |       | Sensory                             |       |                                         |       |
|----------------------------|----------------------------|-------|---------------------------------------|-------|---------------------------------------|-------|-------------------------------------|-------|-----------------------------------------|-------|
|                            | Distal motor latency (m/s) |       | Compound muscle action potential (mV) |       | Motor nerve conduction velocity (m/s) |       | Sensory nerve action potential (µV) |       | Sensory nerve conduction velocity (m/s) |       |
|                            | ULV                        | Value | LLV                                   | Value | LLV                                   | Value | LLV                                 | Value | LLV                                     | Value |
| <b>N. ulnaris (left)</b>   | 3.5                        | 3.6   | 8.0                                   | 10    | 50 – 55                               | 54    | 15.0                                | 12    | 50.0                                    | 39    |
| <b>N. tibialis (right)</b> | 6.0                        | 4     | 8.0                                   | 5.5   | 40.0                                  | 39.5  | -                                   | -     | -                                       | -     |
| <b>N. tibialis (left)</b>  | 6.0                        | 4.7   | 8.0                                   | 3     | 40.0                                  | 42    | -                                   | -     | -                                       | -     |
| <b>N. peroneus (right)</b> | 5.6                        | 3.3   | 5.0                                   | 1.2   | 42.0                                  | 41.5  | 10.0                                | /     | 40.0                                    | /     |
| <b>N. peroneus (left)</b>  | 5.6                        | 3.5   | 5.0                                   | 1     | 42.0                                  | 42    | 10.0                                | /     | 40.0                                    | /     |
| <b>N. suralis (right)</b>  | -                          | -     | -                                     | -     | -                                     | -     | 10.0                                | 3     | 42.0                                    | 55    |
| <b>N. suralis (left)</b>   | -                          | -     | -                                     | -     | -                                     | -     | 10.0                                | 2.5   | 42.0                                    | 51    |

*ULV, Upper limit value; LLV, lower limit value; n.m.=not measured*

### Study Patient 30

|                            | Motor                      |       |                                       |       |                                       |       | Sensory                             |       |                                         |       |
|----------------------------|----------------------------|-------|---------------------------------------|-------|---------------------------------------|-------|-------------------------------------|-------|-----------------------------------------|-------|
|                            | Distal motor latency (m/s) |       | Compound muscle action potential (mV) |       | Motor nerve conduction velocity (m/s) |       | Sensory nerve action potential (µV) |       | Sensory nerve conduction velocity (m/s) |       |
|                            | ULV                        | Value | LLV                                   | Value | LLV                                   | Value | LLV                                 | Value | LLV                                     | Value |
| <b>N. ulnaris (left)</b>   | 3.5                        | 3.6   | 8.0                                   | 10    | 50 – 55                               | 54    | 15.0                                | 12    | 50.0                                    | 39    |
| <b>N. tibialis (right)</b> | 6.0                        | 4     | 8.0                                   | 5.5   | 40.0                                  | 39.5  | -                                   | -     | -                                       | -     |
| <b>N. tibialis (left)</b>  | 6.0                        | 4.7   | 8.0                                   | 3     | 40.0                                  | 42    | -                                   | -     | -                                       | -     |
| <b>N. peroneus (right)</b> | 5.6                        | 3.3   | 5.0                                   | 1.2   | 42.0                                  | 41.5  | 10.0                                | /     | 40.0                                    | /     |
| <b>N. peroneus (left)</b>  | 5.6                        | 3.5   | 5.0                                   | 1     | 42.0                                  | 42    | 10.0                                | /     | 40.0                                    | /     |
| <b>N. suralis (right)</b>  | -                          | -     | -                                     | -     | -                                     | -     | 10.0                                | 3     | 42.0                                    | 55    |
| <b>N. suralis (left)</b>   | -                          | -     | -                                     | -     | -                                     | -     | 10.0                                | 2.5   | 42.0                                    | 51    |
