# Supplementary material for: Heart rate variability biofeedback for critical illness polyneuropathy: a randomized sham‐controlled study
Source: PubMed Central journal article supplement (PMC11554868; doi:10.1111/ene.16512), 2024-10-18
Supplement: ENE-31-e16512-s005.pdf [file ENE-31-e16512-s005.pdf]

## Supplementary Table S2 Spectral analysis of HRV under paced breathing

|                         | Baseline            | Post-intervention   | Follow-up          |
|-------------------------|---------------------|---------------------|--------------------|
| <i>HRV biofeedback</i>  |                     |                     |                    |
| <b>LF</b>               | 41.69 [20.18,113.6] | 168.1 [36.59,820.5] | 117 [22.29,439.7]  |
| <b>HF</b>               | 20.79 [4.09,191.5]  | 131.2 [19.14,521.8] | 32.8 [8.90,97.18]  |
| <i>Sham biofeedback</i> |                     |                     |                    |
| <b>LF</b>               | 26.36 [6.56,174.8]  | 24.99 [15.71,246.6] | 34.22 [9.59,89.68] |
| <b>HF</b>               | 30.76 [6.53,155]    | 87.51 [21.69,790.7] | 29.18 [7.83,170.5] |

### Legend to Supplementary Table S1

All values in median [interquartile range]. Interaction effects between group and time points of measurement were not significant for LF and HF under paced breathing ( $p>0.05$ ).

Abbreviations: LF, low frequency; HF, high frequency
