# Supplementary material for: Heart rate variability biofeedback for critical illness polyneuropathy: a randomized sham‐controlled study
Source: PubMed Central journal article supplement (PMC11554868; doi:10.1111/ene.16512), 2024-10-18
Supplement: ENE-31-e16512-s007.pdf [file ENE-31-e16512-s007.pdf]

**Supplementary Table S1** Time domain analysis of HRV under paced breathing

|                         | <b>Baseline</b>      | <b>Post-intervention</b> | <b>Follow-up</b>    |
|-------------------------|----------------------|--------------------------|---------------------|
| <i>HRV biofeedback</i>  |                      |                          |                     |
| <b>SDNN</b>             | 17.16 [10.22, 30.92] | 36.09 [16.81,43.73]      | 17.67 [10.3, 34.95] |
| <b>RMSSD</b>            | 9.24 [4.24, 29.8]    | 20.23 [9.02, 60.23]      | 9.15 [5.95, 15.02]  |
| <i>Sham biofeedback</i> |                      |                          |                     |
| <b>SDNN</b>             | 16.72 [9.74,41.14]   | 27.52 [12.08,44.15]      | 16.09 [9.70,23.47]  |
| <b>RMSSD</b>            | 13.82 [4.88,57.9]    | 11.07 [5.98,42.32]       | 11.28 [5.78,28.93]  |

**Legend to Supplementary Table S1**

All values in median [interquartile range]. Interaction effects between group and time points of measurement were not significant for SDNN and RMSSD ( $p>0.05$ ). Abbreviations: SDNN, standard deviation of normal beat-to-beat intervals; RMSSD, root mean square of successive RR interval differences
